# Supplementary material for: Measurement and Analysis of Maxillary Anterior Teeth Color In The Chinese Population
Source: Research Square preprint supplement (doi:10.21203/rs.3.rs-2252044/v1), 2022-11-21
Supplement: Supplementary file 1 [file 27adcb60b0a255718b199f3f.xlsx]

## Sheet: Sheet1
central incisorsL20	central incisorsa20	central incisorsb20	lateral incisorsL20	lateral incisorsa20	lateral incisorsb20	caninesL20	caninesa20	caninesb20	central incisorsL30	central incisorsa30	central incisorsb30	lateral incisorsL30	lateral incisorsa30	lateral incisorsb30	caninesL30	caninesa30	caninesb30	central incisors40L	central incisors40a	central incisors40b	lateral incisors40L	lateral incisors40a	lateral incisors40b	caninesL40	caninesa40	caninesb40	central incisors50L	central incisors50a	central incisors50b	lateral incisors50L	lateral incisors50a	lateral incisors50b	caninesL50	caninesa50	caninesb50
81.0497	-0.790485	13.7292	69.194	0.707898	22.8271	71.2023	0.834534	27.3114	79.8196	-0.206975	12.9758	1.08007	0.942707	21.9618	64.4579	1.84605	21.0434	70.3732	-0.404458	17.741	71.7267	0.263538	22.5757	61.8798	1.33284	20.8835	68.7478	0.121772	16.667	71.7857	0.244532	23.031	61.4156	0.437336	20.8968
75.7559	-0.928707	13.8124	76.3549	0.989456	18.6637	68.3479	2.35515	20.8478	72.9842	0.0746445	17.2859	69.7057	0.0432865	18.7236	66.5633	0.650285	20.0511	76.5665	-1.70645	9.91143	69.9503	0.786372	23.0817	68.8667	0.441997	22.6837	71.948	-2.2799	12.3182	62.8002	1.18736	22.5713	65.7923	0.393447	26.589
78.1024	0.00919878	17.7469	78.6999	0.897349	19.4013	72.3137	2.40638	26.1385	80.0914	-0.842195	13.4779	71.7057	0.91522	23.4726	67.2887	1.2666	25.9153	70.0185	-0.308402	17.0166	69.5677	0.795031	16.0532	63.7768	0.624609	25.9811	73.9431	-1.09316	18.4394	65.7492	0.808901	20.0873	65.5	2.41943	23.5735
80.2453	-1.58819	12.2083	75.9987	0.599468	20.1035	69.4511	2.42024	17.8545	80.9404	0.00111757	10.7942	67.9851	0.866986	14.1994	67.4001	1.66986	28.7366	78.2508	-1.74331	17.1981	72.0371	-0.234348	22.8199	64.3973	2.34298	19.3213	73.9458	-0.730816	16.3092	66.9063	1.34905	19.8577	62.0537	1.6988	19.5632
73.4744	-0.746082	10.4113	69.4273	0.651897	19.521	63.8876	2.09585	25.329	82.5728	-0.0901747	15.1558	69.3318	1.45748	22.8947	65.5305	1.78386	27.9106	78.5933	-0.426307	17.2825	71.6636	0.638995	18.6733	68.3902	2.1097	27.0653	69.7951	-0.496396	18.7797	69.4681	-0.299351	20.4649	63.9271	2.18795	23.5859
80.121	0.477159	14.9388	71.2354	1.43392	22.69	69.356	1.49416	24.4914	72.3092	-1.93075	16.6749	70.853	1.43319	16.1535	71.8226	0.653124	21.6264	70.0253	-0.186466	14.944	64.1567	0.397921	17.9067	66.4046	1.93526	28.8064	72.2093	-0.0994813	15.1824	72.0974	0.565637	14.6847	59.1031	0.813713	24.9543
77.9148	0.288952	15.3272	71.5137	1.29517	12.8643	67.1339	1.75996	17.8397	82.1682	-0.932873	10.9675	74.683	1.21318	21.9322	67.3943	2.58809	20.2073	74.8805	0.0815395	13.1124	65.9022	0.430006	20.4338	66.1842	0.435037	29.5119	73.1231	-1.07278	16.5041	66.8062	-0.54248	23.1483	57.4025	0.690528	24.6893
75.3968	0.495149	18.6323	72.1683	1.17004	19.8746	71.7618	2.54883	19.1441	80.2081	-0.807165	10.5766	72.2844	-0.471253	14.4109	71.8867	1.00748	22.2688	72.1062	0.107511	9.56115	74.3069	0.924953	17.5667	64.5613	0.819357	25.1269	74.9939	-2.27955	16.8804	68.7488	-0.585203	20.7622	64.3644	1.57808	19.9462
74.9934	0.387452	16.6884	70.7883	-0.0410618	21.1225	66.6924	1.71821	18.5276	80.6696	-0.0384193	11.1808	76.4746	-0.258074	14.0032	71.5747	2.70714	27.0511	78.8013	0.195541	15.9076	70.7556	0.737596	20.0217	58.968	0.450353	21.7403	67.4315	-1.87795	12.9857	62.5156	0.101689	19.4778	65.777	0.875767	27.8707
75.9372	0.169375	10.3635	76.3205	0.405682	18.6751	73.2809	2.46341	21.0009	77.4256	-1.63613	18.2945	69.6542	1.081	17.1612	67.4155	1.66022	28.0867	73.5925	0.132947	15.1537	68.4604	0.580493	15.6715	65.054	2.18998	19.1619	77.3742	-1.93941	17.6615	71.1074	-0.322575	14.7945	62.6766	1.33926	23.6185
76.1179	-0.815536	17.3353	77.7073	-0.616226	16.8802	70.9932	0.883898	22.9923	74.9097	0.188633	11.9433	75.968	0.853261	15.5763	69.3887	1.04166	23.0896	77.8704	0.112983	13.8017	66.1886	-0.457322	22.3991	59.2925	1.72358	26.3663	69.9984	-0.752207	12.4626	69.1841	1.11608	21.855	62.8451	0.320802	27.4943
76.7167	-1.25254	11.6577	76.3167	0.91577	17.0058	64.6767	1.97783	23.9933	82.8572	-0.155993	12.0694	68.2903	0.23623	15.1218	67.3513	1.68351	23.3166	69.8042	-1.07115	18.7229	72.9636	0.737713	23.5755	60.1591	0.563714	28.9019	76.6862	-0.34672	14.0209	70.2182	1.21782	14.795	64.0037	1.55359	25.567
73.5119	-1.27027	17.9021	70.1813	0.89013	18.5843	65.517	1.38599	17.6171	75.2349	-1.1765	14.1198	74.4927	-0.162429	14.8719	66.3872	0.980967	20.1559	78.098	-0.30461	11.7191	69.3003	0.452666	20.6315	66.9288	1.94512	22.982	71.9211	-1.64291	10.0721	68.6938	0.795878	22.9113	63.3978	0.401074	27.8723
82.3608	-0.740126	15.1164	75.3592	0.975498	18.9978	70.82	1.28811	25.4668	78.0579	-1.07782	10.759	71.5986	0.309298	19.0638	67.3311	1.57222	29.6128	72.1444	-1.54384	10.0069	68.7922	1.02331	18.5648	65.2663	1.2266	26.3145	76.1544	-0.9958	11.3059	67.4423	-0.13458	24.3408	58.7349	1.88597	22.5814
74.2426	0.173395	11.788	74.7181	-0.218377	15.7302	63.9556	1.66713	22.8057	80.7094	0.262822	11.7737	67.2145	1.24683	18.8639	65.663	1.60705	28.7469	73.4687	-1.48615	14.7992	71.513	0.176281	14.5994	61.8303	0.475699	22.946	72.9206	-0.508937	17.3823	69.935	-0.827127	21.033	57.8156	1.64897	22.7014
75.3198	0.101728	11.8021	73.4052	-0.22268	22.3869	71.9	2.11045	25.6221	82.4077	-1.57464	16.9582	68.1761	1.06288	23.0039	63.1001	0.571923	27.4751	71.0033	-1.22218	10.7206	68.0953	-0.260738	22.9586	62.7838	2.23307	26.8031	69.9678	-1.47902	17.9742	63.029	-0.361562	22.0265	63.2262	2.49393	22.3281
75.7571	0.346036	11.9762	73.1089	1.0668	12.6739	71.8172	1.8632	22.4413	75.7212	-1.73699	15.9429	75.5441	0.830236	23.0942	66.8706	1.27235	22.9481	75.1224	-1.54007	11.6161	69.5725	0.107251	14.4731	68.0145	0.56264	19.361	74.4065	-0.17874	11.6832	63.5233	1.05859	17.2843	64.1888	1.92809	26.0106
77.0223	0.320583	15.0813	77.7931	0.826953	16.1625	72.2238	1.26308	26.8607	81.8129	-0.261369	11.8814	74.5918	0.556967	15.5378	64.0161	0.999155	24.9377	76.1292	0.18927	13.9525	69.1165	1.06592	21.6509	64.0037	0.47075	19.9089	73.952	-0.181062	17.8752	67.1358	0.905929	23.0947	60.8394	0.615302	22.0128
74.6199	-0.325329	13.676	75.6812	-0.00949026	21.6691	70.5834	2.44157	26.9824	80.8312	-0.170289	11.6283	70.2504	1.08774	20.6004	70.572	2.18961	26.4662	73.8706	-1.61014	13.2393	65.4476	-0.44512	19.5116	66.0661	1.15886	25.5323	73.2901	-1.98179	15.0169	68.4868	0.509377	17.0606	62.8732	0.386663	19.2713
74.7693	-1.2952	14.0384	73.025	1.52811	15.7414	67.9816	1.03122	22.4053	76.6454	-0.488554	12.5085	70.7099	0.551345	21.1519	69.0871	1.66422	21.498	74.2161	0.259626	15.3125	68.3452	0.232977	21.6567	64.2069	0.732374	23.2106	67.968	-1.9893	15.1052	62.4281	-0.111762	23.3104	61.0879	2.28399	24.3083
73.7566	0.303719	9.80779	77.9212	1.53818	21.665	72.8043	2.04234	21.9972	73.3056	0.205767	11.4555	69.2811	-0.0957961	17.9175	71.8898	1.46791	29.2477	72.7359	-0.177779	14.134	64.5171	0.440177	17.6238	67.5956	0.955069	27.9193	76.5157	-1.51655	18.2089	70.2137	1.4759	20.0208	60.7616	1.22348	25.0721
81.4104	-0.677385	18.5294	76.4946	1.57022	17.5213	73.4357	1.15647	17.8124	80.5213	-0.706574	12.0593	68.7461	0.105316	18.9092	67.1692	2.5543	29.4719	76.7105	-1.29845	14.1061	71.7363	-0.314442	18.1421	60.7158	0.823555	21.6315	77.6033	-1.94145	13.7452	72.0084	0.996637	23.209	58.6939	2.15351	24.0184
82.3821	-1.26385	15.0567	78.1239	-0.585927	17.4264	72.1767	2.6377	21.5746	75.3795	-1.69023	10.3619	71.385	0.274313	14.1412	69.4561	2.25741	27.9443	71.8248	-1.24399	13.3833	72.8919	0.635623	18.8657	65.6113	0.392695	25.5045	76.1067	-1.48931	12.4212	62.9993	-0.807798	23.2625	66.1017	0.873949	20.6876
77.5009	0.498116	14.4878	72.6008	0.193906	15.7394	63.8333	2.44438	25.1952	72.8518	-1.3559	10.0649	71.1538	1.19238	19.7568	62.6687	0.563514	21.3153	69.6082	-0.330156	18.1296	68.9655	0.48596	16.7675	60.8858	0.759699	25.3868	76.6573	-1.44429	12.2585	68.5022	0.828607	15.6425	60.0276	1.63805	24.9814
79.7159	0.264608	14.2259	69.1471	1.61193	15.4285	70.1737	1.40307	20.4726	81.5411	-1.52119	15.9138	73.2418	0.128372	19.5985	68.4664	1.15984	28.9796	77.3628	0.098502	17.8202	67.3018	0.269258	15.9098	61.6597	1.79789	20.4549	68.6022	-0.0638313	12.0673	72.1969	0.231958	15.4677	57.7581	0.692223	21.0593
79.7087	-0.426012	17.9258	73.3953	0.838161	19.3522	65.683	1.15426	20.1874	73.8168	-1.12366	11.1462	76.9332	0.348414	18.0396	64.6587	1.98878	22.01	72.8607	-1.83689	15.6778	71.9853	0.864886	23.5715	67.046	0.718604	23.4416	70.9283	0.135835	15.6345	62.5849	-0.449172	23.0739	64.648	1.52202	23.5999
74.9147	-1.11641	9.79252	68.4422	0.389763	21.3547	66.4905	0.865409	24.7014	73.9256	-0.619625	12.4603	71.4548	0.610508	15.3849	71.7905	1.34895	24.8784	75.7219	-1.89439	12.5938	68.6667	0.400581	19.2541	65.108	0.392156	26.4185	69.1302	-2.15171	13.4017	65.3105	0.8396	22.4104	60.0095	1.66128	26.4412
79.6751	-0.57166	16.8473	73.6176	-0.596021	17.9696	65.0944	1.34748	19.1397	80.7762	-1.34071	17.2867	72.4615	0.952502	23.4951	68.2762	2.0213	28.3253	75.4384	-0.187034	13.8728	66.8932	1.1699	14.5799	65.4726	1.61163	28.9201	68.3521	-0.244225	16.7067	66.0536	-0.532983	14.5836	64.5882	0.793014	26.6578
77.8621	-1.51267	8.75169	70.404	0.619111	19.9101	69.326	1.75757	24.8616	73.6046	-1.57157	16.7084	70.9064	-0.618921	20.8493	69.7895	1.25314	29.0685	78.7707	-0.0697986	11.3728	68.0277	0.26977	18.386	65.1961	1.42868	28.9753	77.8752	-1.80297	12.6967	70.2338	1.5584	14.9165	58.9878	1.50184	19.2288
75.4874	-0.695444	16.5694	70.8824	0.922172	15.9567	68.6264	1.91092	22.0121	79.3318	0.22469	10.798	71.5989	0.426717	15.7867	71.668	0.541973	28.8381	77.4661	0.0252304	18.6983	66.6749	0.0845715	14.5105	59.1274	1.53818	21.1005	73.1603	-2.00278	18.1685	64.5894	-0.181789	22.5248	63.6624	0.444605	21.9439
80.9975	-1.3168	13.2188	72.7902	0.104234	13.0844	72.3842	1.52646	22.335	79.8448	0.154059	17.9232	69.5718	0.801801	21.3748	64.7405	2.0133	25.2377	72.8292	-1.84732	16.9344	72.8913	-0.216289	20.7332	66.3036	1.25928	23.6894	67.8857	-0.341344	16.1358	65.3949	-0.783659	14.6125	66.7265	2.16033	28.6393
76.5981	-0.493085	15.3736	73.139	0.676955	18.7777	71.3906	2.3449	27.0348	73.9183	-0.130554	10.5905	74.1389	-0.0686603	14.9454	64.3232	1.06212	28.835	71.3192	-1.85736	15.2263	68.2902	1.02913	15.8853	60.1875	1.8296	22.6242	71.5581	-0.965355	14.5571	66.0911	0.845979	17.3509	63.5639	1.59895	19.8584
73.6518	0.45448	11.2588	71.7347	0.300642	22.3002	63.6783	2.04549	23.7396	75.7335	-1.45797	12.7719	71.3813	-0.319393	18.5443	71.2582	1.78467	18.8734	75.7781	-0.916397	12.65	66.6065	0.317644	22.2028	61.7822	2.23177	26.8095	73.788	0.272627	14.8357	70.7474	-0.728232	18.5193	64.8622	2.43787	21.9089
75.7055	-0.875629	16.2164	69.1469	0.789234	20.6762	71.5385	2.41641	21.9319	74.2448	0.308466	17.2171	68.7724	-0.437021	19.0103	64.2019	1.3989	27.7977	72.0352	-1.77415	12.7629	74.7763	-0.435513	14.1643	63.3071	1.01948	21.822	70.1582	-2.29506	16.7452	72.1445	-0.231301	14.4852	66.5859	2.46776	28.7969
75.9045	0.0286372	12.4454	75.4388	1.11606	21.7518	64.2152	0.621559	20.1391	79.8795	-0.62695	15.2219	76.3358	0.0968899	16.8326	67.0872	2.23535	29.0475	75.52	-0.790977	18.4514	68.0886	0.54606	19.5984	68.7747	0.670535	19.7201	76.3174	-0.701928	18.7707	63.2514	1.23717	18.0746	59.8813	1.69785	26.6082
79.2861	-0.576159	15.4762	70.6558	1.3107	17.4085	65.385	2.40538	22.3252	79.3636	-0.378122	10.9049	67.8777	0.854082	19.5429	65.1732	0.48261	26.0757	76.6686	-1.56749	12.4039	74.2512	0.0968786	22.0087	68.047	2.24025	19.2679	76.5474	-2.20167	18.6403	69.4133	1.58763	21.0383	57.8261	1.92423	24.0797
75.0059	-1.53873	11.8324	71.3249	0.539807	18.0073	68.1389	0.970814	21.1846	74.29	-1.69059	13.8388	68.6733	1.42119	15.2554	63.748	2.13872	29.5474	76.951	-0.975102	11.9235	70.343	0.784575	21.3756	64.8713	0.881883	24.9487	71.5906	-1.51318	16.7143	65.7652	0.766858	24.4283	58.4385	1.59292	22.8035
79.8382	0.117313	12.2293	72.9516	0.113571	18.6781	64.2833	2.62739	24.1707	83.2733	-0.971734	15.8319	73.7804	-0.483967	17.5407	70.3176	1.62807	21.6712	79.878	-0.903049	16.7865	71.7773	0.0718653	18.8323	64.1303	1.80085	23.1427	67.7974	-0.522689	15.5503	63.0472	-0.79044	23.0968	61.9252	0.440766	22.337
74.8093	-0.552532	17.4293	75.1247	0.331505	18.623	72.6362	0.776556	20.5078	77.6331	-1.24172	12.1629	76.3029	0.288266	16.55	71.8113	0.695358	26.2566	75.1808	0.0698617	18.2397	73.9811	0.0259853	20.8227	67.9292	1.3828	21.0961	75.6844	-0.4022	11.0166	66.1998	0.899029	15.6703	59.807	0.834059	19.462
74.9617	0.250101	13.0124	76.5026	1.58889	14.1544	68.2126	1.1951	27.0509	73.1542	-0.783912	11.0301	72.1164	-0.441494	19.7723	65.7501	1.39231	18.9052	72.4421	-0.81764	15.4599	73.2425	0.857764	19.2914	62.2684	1.81645	23.9286	67.786	0.0674147	11.3675	66.5826	-0.258041	19.3606	66.0153	0.354551	28.9161
78.0984	-0.523853	16.2466	76.0945	0.856691	16.6532	68.1849	2.39257	21.8375	80.9406	0.319115	17.134	72.4259	0.50887	14.2789	66.7918	1.36504	29.3161	72.2368	-1.45963	18.1813	69.6998	0.645047	14.4019	62.8765	1.20979	20.3117	76.4372	-1.41307	14.3389	66.3332	0.17655	16.6994	64.6731	1.88068	28.6982
77.4496	-0.295181	16.0689	75.3251	1.45309	17.5554	72.7967	1.74348	18.5996	80.6669	-1.54562	18.4182	72.2635	1.37115	22.2572	70.7494	2.31613	23.0699	79.2431	-1.44702	11.5107	66.7717	0.593502	19.5358	60.3243	1.10592	29.4651	73.6341	-0.916306	17.0803	69.785	-0.482927	22.3717	65.8852	1.42736	20.8441
77.1194	-0.558031	11.4817	71.7245	-0.595282	14.2116	71.97	2.02132	22.5357	81.6082	-0.693319	14.2052	70.6651	0.757435	20.1192	67.5018	2.29045	23.3582	73.0266	-1.22969	13.8655	73.4885	-0.108273	16.9408	64.8299	1.20669	28.8544	74.3121	-2.20222	13.2539	64.1308	0.412182	19.4971	66.6672	2.16796	23.3206
78.5484	0.546972	8.73565	76.6961	0.165284	19.7051	69.1555	1.84042	18.7953	73.0911	-1.23403	15.1793	77.1271	0.556299	18.5062	70.0758	0.522487	20.3189	74.1223	-0.39961	9.58743	74.7633	-0.396736	16.7883	62.067	0.892561	20.7179	74.4773	-1.62213	10.8026	67.8184	-0.209051	14.7912	58.7877	1.13095	26.8336
77.5592	-0.625479	14.5783	75.0679	1.03654	13.2918	65.3343	1.28617	27.9704	78.3758	-1.18044	13.0964	75.5741	-0.0904393	16.0754	65.0673	1.60812	20.1513	70.5297	-1.08144	10.4965	71.1841	0.732491	23.7747	61.0851	1.5764	19.615	72.8128	-0.450361	16.5529	70.0905	0.902042	15.8089	63.1886	1.51338	22.286
78.9698	0.0933146	14.1135	70.6131	0.0332792	19.104	66.1534	1.57764	17.6003	73.1827	-0.910395	17.3485	71.4348	-0.578934	15.0305	66.3071	1.99515	28.2898	79.5777	-0.418375	12.2532	69.8472	0.0371658	16.8675	64.8137	0.483662	25.306	73.3096	-0.697053	16.6667	68.2855	0.00575144	21.5473	59.201	0.80662	24.5925
81.2693	-0.306793	10.3185	70.6737	-0.278199	15.55	68.5818	1.00721	27.4539	81.3498	0.108523	12.0391	72.855	0.395841	17.2464	65.4464	1.26918	28.8237	77.0962	-1.37598	18.0651	70.3181	0.952292	21.4844	61.6005	2.22805	24.932	70.7195	-0.643713	17.9623	69.4375	-0.269978	18.3525	62.2599	2.17404	26.5212
81.6488	-1.08361	11.2352	76.0197	1.6159	17.1577	69.6216	1.07687	26.9107	74.1138	-1.15431	11.0177	71.1747	0.346652	20.2211	70.498	1.88493	23.5926	71.8059	-1.15655	13.5105	71.2246	0.763461	21.5567	59.7776	1.86846	27.9726	68.3052	-1.90026	11.234	62.5851	-0.202016	18.7293	66.2793	1.8046	25.8586
77.9374	-0.784706	13.7669	75.0767	1.09959	14.0935	68.882	2.4241	18.5879	73.4617	-0.1855	13.152	74.361	1.00886	23.352	63.6751	0.910108	28.7805	72.0365	0.31258	10.863	65.4753	1.08747	21.7581	68.6416	0.773564	22.1611	73.9954	-0.981947	14.6959	69.9976	0.627721	24.2592	67.2065	0.712952	28.9372
75.3487	0.551393	12.1001	76.9513	1.39412	22.866	71.4874	1.36854	25.0925	76.8794	-1.79913	14.5254	74.3816	1.31789	16.1063	63.8395	1.39109	19.2863	75.3749	-1.79897	14.6988	70.724	0.80758	16.4201	63.6507	0.463542	22.6998	68.4927	-1.78443	12.9766	70.9662	1.26927	21.2371	61.989	0.57465	25.2807
81.7375	-1.07345	12.9881	72.4947	0.425886	12.5368	71.5056	0.792641	21.5275	77.9685	-1.5841	16.6669	73.4492	0.505104	22.2795	63.8136	0.464242	27.8019	74.7567	-0.605921	12.567	69.2829	0.0496949	20.5442	59.6397	0.882181	24.9154	73.872	-0.184822	18.4033	69.805	0.0692071	16.1638	61.2358	2.303	20.6977
81.796	-1.16171	12.9555	70.0513	1.24409	13.5723	64.0169	2.14089	21.6924	81.5135	-0.682557	15.3159	74.1345	0.389614	16.999	64.3608	1.18477	21.7329	78.4417	-1.75496	9.83181	68.5698	1.08164	15.2262	67.4369	1.47854	27.617	68.6913	-0.853598	14.0057	66.6296	-0.488553	20.5574	65.7936	0.303166	20.1613
81.2424	0.162825	9.28524	76.5611	0.100915	18.5327	67.5446	1.7718	18.159	72.793	-0.907338	14.8193	75.1826	-0.259026	21.8271	69.3726	1.3212	28.8438	71.6674	-1.7528	16.6362	65.6855	0.669708	22.6952	66.6668	1.78365	25.4214	73.8447	-2.15185	16.6692	67.4812	0.736693	23.8962	66.5065	1.52174	24.6005
77.2135	-0.327656	13.5186	69.0572	-0.50541	17.3595	66.9842	1.69424	27.7071	81.7857	-1.69694	15.291	69.4239	-0.186191	14.6236	67.721	1.60574	27.509	72.0878	-0.00694433	15.8573	66.4693	0.577609	18.2949	59.4936	1.08082	23.6391	74.9161	-0.362339	10.4128	63.0822	-0.591579	14.7947	61.2778	1.03044	19.5945
77.4972	-0.596804	14.5721	75.8925	1.1423	16.1048	73.4331	2.23302	18.9282	73.1387	-0.613206	18.4839	73.3403	1.26858	16.5023	68.4508	0.552877	24.8422	70.6868	-0.678614	17.9433	74.0716	-0.448142	17.3921	64.0133	2.13718	19.8971	75.6045	-1.29141	16.9176	62.2786	0.207206	22.7161	58.2814	1.07398	28.1408
81.5054	-0.347584	10.6665	73.8361	0.951403	18.0596	65.5851	1.40698	23.4034	76.8416	-0.359302	10.2996	69.5374	0.946402	20.0017	69.619	0.790167	26.7218	70.148	-0.525964	14.1536	71.8894	1.13734	21.8247	59.0459	1.31875	22.7065	73.7738	-0.461109	19.0955	69.8456	-0.134904	22.2211	59.5736	1.85376	19.7503
77.3598	0.0138412	16.2312	70.2663	1.0423	20.1102	66.5004	2.21266	24.3963	72.8769	0.288434	10.844	75.7608	0.773631	19.0103	65.3321	2.13763	18.8129	72.8761	0.248274	12.8976	73.7109	-0.331639	15.6635	61.4077	0.853328	21.8921	76.3015	-0.667827	11.3196	67.2251	-0.129448	15.232	63.6097	0.517333	21.9766
74.0218	0.407347	15.0228	77.4556	1.07947	16.056	65.3245	1.08803	22.504	73.6505	-1.95058	14.2453	76.388	1.08571	20.869	67.8606	1.4179	28.2006	79.4476	-0.0381839	14.8299	67.761	-0.278913	20.4752	66.7545	2.45037	24.7071	73.4859	-0.491352	11.1184	64.4765	0.773327	21.0211	63.6858	1.2598	28.7368
78.4917	0.295514	13.9864	71.5026	1.25859	16.19	66.8997	1.2054	19.9434	75.8223	-1.04837	11.9806	74.5837	-0.367633	22.7104	71.8243	1.01846	26.4317	79.7094	-0.714681	11.6079	64.4751	0.889475	23.5827	67.9651	2.37712	26.2034	73.8638	-0.827832	18.9695	67.7455	1.47551	24.0233	65.473	1.53745	26.9363
80.0607	0.499772	13.5201	76.5171	1.53947	17.0325	68.0344	2.40621	26.897	77.1879	-1.01512	16.0129	75.4007	0.58417	23.5369	62.9126	1.60905	28.5244	73.57	0.287036	10.6249	64.1924	0.896768	17.3033	63.7429	2.23043	20.5842	71.3305	-1.65078	12.2698	66.5825	0.566844	22.3285	60.9164	1.1991	23.2553
73.9716	-1.01821	15.8945	74.1591	0.350154	14.5893	73.1645	1.4201	26.2361	76.24	-1.60103	14.9014	71.4585	-0.0615567	15.1901	66.3958	0.9867	22.3958	77.3647	-0.80538	9.68842	64.7201	1.20425	21.8286	60.35	0.415612	21.9201	67.4056	-2.0387	13.2772	67.5051	0.380064	19.712	66.972	1.31788	27.0671
82.1913	-0.0624106	16.5838	73.537	1.5885	15.6605	73.1746	0.937051	23.2436	83.1117	-0.0896319	13.4202	70.0948	1.33698	19.2412	72.1293	0.752105	23.7437	72.4777	-1.71875	10.9814	74.0044	-0.393159	14.6847	62.2483	1.16962	19.1279	75.5441	-1.70636	12.2664	62.9739	0.859067	23.3503	65.159	1.84644	24.2717
79.8736	0.090876	10.9582	73.7923	0.829543	14.7413	69.4774	1.8016	26.51	74.1272	-1.36591	16.6789	72.5623	0.171492	19.0363	64.1668	1.8539	21.7631	72.3107	-1.3605	16.6731	64.5966	0.955551	14.8878	64.1719	2.1894	26.6332	67.4832	-1.88928	13.2001	67.7673	-0.464094	19.3904	64.3552	0.644441	22.6782
73.3353	-0.980504	14.1785	76.9469	-0.613312	22.3748	70.7177	1.2646	25.3278	79.9136	-1.90552	13.0167	67.9928	0.899399	17.4944	64.045	0.62564	21.4664	73.3977	-1.70431	15.77	73.8473	0.809072	20.7558	66.6791	2.38354	23.2326	67.5437	-1.59601	12.053	67.7263	-0.129893	21.355	60.7866	0.479437	21.5053
77.7834	-0.172949	12.9587	69.1409	0.221826	15.6736	67.2672	1.40858	19.8076	77.9242	-1.88145	18.6408	75.0037	0.0661361	21.6832	71.1566	0.712149	27.8659	71.1089	0.0123631	16.4336	72.4865	1.01984	14.2354	63.3991	0.990402	22.0005	69.1517	-0.897892	11.2699	64.3712	-0.79042	22.4142	65.4854	1.27904	21.2494
76.6894	0.335488	9.04195	72.2292	1.30239	19.4261	63.8194	1.43773	26.1452	74.2784	-1.62731	12.8252	68.3717	0.424255	21.21	62.9034	2.11228	20.4003	75.1334	-0.364808	17.5646	71.0743	1.07535	14.7929	61.0668	0.403542	22.9302	75.3447	-0.808852	14.0577	63.679	-0.750221	21.7789	64.3575	2.34279	23.5341
73.233	-1.01642	15.7588	76.3935	0.564493	12.2209	65.7586	1.50928	23.1533	75.4853	-0.850197	15.6041	72.7763	-0.585099	14.3899	69.1788	0.992075	23.306	76.9662	-0.725131	15.707	70.1528	0.964516	16.9678	68.1969	1.0018	24.4993	70.0918	-1.45007	11.1929	64.6288	-0.328448	15.085	59.3409	1.09673	24.463
79.1743	-0.0744366	17.0099	70.9438	0.133593	13.0622	69.5798	2.61728	26.3396	75.974	-0.451474	11.388	73.4808	-0.251939	14.9935	67.6599	2.24357	20.1644	71.4995	-0.643786	16.2826	65.637	1.11055	16.8516	63.8563	0.377954	29.1954	74.6694	-0.662316	12.7882	67.1749	-0.846668	23.6266	63.1163	2.34844	24.1096
79.9255	-0.40364	14.9266	76.6204	0.370638	16.9562	68.5015	2.23732	23.7696	79.3111	-0.515558	18.0104	69.9633	-0.458443	23.0458	67.7494	1.14052	29.5781	73.5952	-1.82109	13.3985	70.2418	0.356081	23.7983	63.2992	0.838617	22.2998	74.9844	-1.37276	13.2636	68.5625	1.12965	16.9919	65.1127	1.27545	24.2427
73.1951	-1.13689	12.8693	71.9903	0.139957	14.1438	65.5492	2.53487	22.9261	79.135	-0.195858	16.7785	68.9773	-0.25074	20.8032	67.216	1.78674	29.3136	69.3982	-1.38028	11.0906	70.8511	0.365496	16.5435	62.5086	2.05674	24.7864	72.1263	0.295964	18.8354	65.1255	1.17561	19.9304	61.7778	1.95074	27.9779
77.638	0.118108	13.9551	72.4539	1.01897	15.8873	66.7629	2.49478	21.3601	76.4399	0.0828467	15.1771	76.5529	1.2921	16.3826	62.6586	1.60288	23.1651	76.5027	0.0474478	18.5002	70.8239	-0.42317	14.9991	66.2583	1.97863	19.481	72.8792	-1.06893	16.388	62.4609	1.29429	19.4096	58.6416	0.606072	28.2117
81.6181	0.220412	13.4824	77.3843	-0.652084	18.4566	71.3995	0.905523	26.5772	82.3526	-0.47991	12.3532	74.5263	-0.0590567	22.6274	66.3558	0.82394	28.0798	75.2303	-0.0942056	11.1462	64.7257	-0.317692	17.1898	65.1963	2.09478	21.2233	72.1297	0.16325	10.1412	66.7958	-0.866235	23.2529	64.3034	0.775622	24.2519
74.7617	0.169872	12.6426	77.5605	0.935599	19.5269	73.4742	1.83603	27.7915	77.4639	-1.96755	13.6705	75.3105	0.431228	22.5394	65.9635	0.832771	25.705	75.9762	-0.78815	17.4181	74.2589	-0.400117	20.0083	67.5846	0.698516	27.1411	71.9037	-0.299652	16.6585	66.9297	0.828096	14.9954	62.8933	2.4285	28.3281
79.6733	-1.14935	15.0688	68.6586	0.983501	18.4963	66.0807	2.40632	21.6322	82.835	0.318103	12.1268	72.6763	0.719346	16.8432	66.7384	0.814802	20.658	79.7489	-0.378365	16.3703	65.7908	-0.458156	18.5558	67.8566	0.566064	24.1938	69.4081	-2.09838	11.5055	65.9127	1.41134	16.6228	60.5549	1.39423	25.2641
78.0926	-0.990295	16.9066	69.4063	0.32642	13.2633	66.3456	1.98907	23.2018	73.5998	0.29296	10.1212	73.1529	0.552668	14.7866	63.7948	1.54164	28.6073	71.3445	-1.13902	14.4708	68.4397	0.825451	15.019	59.9694	2.31779	22.3683	70.2167	-1.15123	11.7242	70.441	0.886461	24.2924	61.1509	1.78671	20.8749
74.8779	0.156043	13.0953	75.5991	1.50365	18.1408	70.6267	2.09381	25.3332	79.9856	-1.42411	11.3254	69.1759	0.649584	14.966	63.7642	2.04324	20.7213	79.1398	-0.823136	14.7665	66.5052	1.1143	21.4057	66.5188	1.95084	19.0622	77.7157	-1.71432	13.3724	72.5628	-0.272951	17.0467	59.6622	2.51122	26.3355
									80.9041	-0.396022	18.3569	69.5711	-0.561132	14.3992	63.5183	1.09999	19.0574	73.4884	-1.75141	14.5188	65.9282	-0.0541119	16.6006	65.1028	1.09648	29.4139	68.8627	-1.20799	15.1045	64.6047	0.706633	15.7508	64.8688	0.524841	20.3599
									72.5235	-1.44793	17.8505	75.5203	1.34177	17.1888	63.1002	2.33718	27.9924	76.1743	-0.400157	14.5767	68.5937	-0.219426	16.3641	65.546	1.19052	21.5973	71.0037	-0.88841	11.796	65.9377	0.33496	15.7201	59.2492	1.57438	25.0496
									76.8737	-1.38182	15.153	71.7781	-0.494407	16.0156	63.9585	1.32945	29.6003	79.2632	-0.206463	15.4919	69.7242	1.24377	15.826	63.1248	0.690765	18.9803
									79.6532	-1.96437	17.8744	69.7701	-0.154136	18.0514	69.8778	2.44414	22.5916	71.4108	0.313202	15.1466	65.7244	0.339922	19.8316	66.3357	2.42173	23.395
									77.8679	-0.943432	13.4097	69.4478	0.634677	22.0616	67.8511	1.00231	20.3382	76.4414	-0.960336	16.443	70.1356	0.17572	15.8116	63.1199	0.971491	20.3039
									74.9397	0.178284	16.3015	69.4879	0.141955	21.2067	65.3252	2.18168	18.8269	71.0164	-0.262506	15.6557	67.1556	0.221493	20.6428	63.7487	1.77235	27.6273
									80.1443	0.251404	18.074	73.6037	-0.205375	15.5023	62.5622	1.63312	29.1879
									74.4049	0.325039	18.3879	73.7934	0.942913	16.5871	63.3467	1.18813	23.526
